# Supplementary material for: Subversion of Lipopolysaccharide Signaling in Gingival Keratinocytes via MCPIP-1 Degradation as a Novel Pathogenic Strategy of Inflammophilic Pathobionts
Source: PubMed Central journal article supplement (PMC8262937; doi:10.1128/mbio.00502-21), 2021-06-29
Supplement: mbio.00502-21-st001.pdf [file mbio.00502-21-st001.pdf]

**Table S1. Oligonucleotides used in the qRT-PCR.** <sup>1</sup> Denaturation (1); Annealing (2); Elongation (3).

| Oligonucleotide                   | Sequence                             | Program <sup>1</sup> |
|-----------------------------------|--------------------------------------|----------------------|
| <b>Human primers</b>              |                                      |                      |
| <i>EF-2</i> F                     | 5'- GACATCACCAAGGGTGTGCAG-3'         |                      |
| <i>EF-2</i> R                     | 5'- TTCAGCACACTGGCATAGAGGC-3'        |                      |
| <i>IL-1<math>\alpha</math></i> F  | 5'-CGCCAATGACTCAGAGGAAGA-3'          |                      |
| <i>IL-1<math>\alpha</math></i> R  | 5'-AGGGCGTCATTCAGGATGAA-3'           |                      |
| <i>IL-1R</i> F                    | 5'-CCTGCTATGATTTTCTCCCAATAAA-3'      |                      |
| <i>IL-1R</i> R                    | 5' AACACAAAAATATCACAGTCAGAGGTAGAC 3' |                      |
| <i>IL-1RAP</i> F                  | 5'-CTTTGACCGAGACAGTCTG-3'            |                      |
| <i>IL-1RAP</i> R                  | 5'-GTTCCCTGGAGCACGTAGTTG-3'          |                      |
| <i>MCPIP-1</i> F                  | 5'-GGAAGCAGCCGTGTCCCTATG-3'          | 1. 95°C, 30 s        |
| <i>MCPIP-1</i> R                  | 5'-TCCAGGCTGCACTGCTCACTC-3'          | 2. 62°C, 30 s        |
| <i>NCF-1</i> F (p47phox)          | 5'-AGAAGAGCGAGAGCGGTTG-3'            | 3. 72°C, 45 s        |
| <i>NCF-1</i> R (p47phox)          | 5'-CCAGGAGCTTGTGAATGACCT-3'          |                      |
| <i>PTGS2</i> F (COX-2)            | 5'- TGGTGCCTGGTCTGATGATGTATGC-3'     |                      |
| <i>PTGS2</i> R (COX-2)            | 5'- ATCTGCCTGCTCTGGTCAATGGAA-3'      |                      |
| <i>CAMP</i> F (LL-37)             | 5'-ACACAGCAGTCACCAGAGGATTGT-3'       |                      |
| <i>CAMP</i> R (LL-37)             | 5'-AAATCACCCAGCAGGGCAAATCTC-3'       |                      |
| $\beta$ D-2 F                     | 5'-GATGCCTCTTCCAGGTGTTTTT-3'         |                      |
| $\beta$ D-2 R                     | 5'-GGATGACATATGGCTCCACTCTT-3'        |                      |
| <i>IL-33</i> F                    | 5'-AGGTGACGGTGTGATGGTAAG-3'          |                      |
| <i>IL-33</i> R                    | 5'-GCATATTATGAAGGACAAAGAAGGC-3'      |                      |
| <i>IL-36<math>\gamma</math></i> F | 5'-TAGGACCTCCACCCTTGAGTC-3'          |                      |
| <i>IL-36<math>\gamma</math></i> R | 5'-AATGATGGGCTGGTCTCTCTT-3'          |                      |
| <i>IL-18</i> F                    | 5'-ATCGCTTCCTCTCGCAACAA-3'           |                      |
| <i>IL-18</i> R                    | 5'-CTTCTACTGGTTCAGCAGCCATCT-3'       |                      |
| <i>IL-12<math>\alpha</math></i> F | 5'-ATGATGGCCCTGTGCCTTAG-3'           |                      |
| <i>IL-12<math>\alpha</math></i> R | 5'-TCCGGTTCTTCAAGGGAGGA-3'           | 1. 95°C, 30 s        |
| <i>IL-12<math>\beta</math></i> F  | 5'-ATTCTGCGTTCAGGTCCAGG-3'           | 2. 63°C, 30 s        |
| <i>IL-12<math>\beta</math></i> R  | 5'-TCCGGTTCTTCAAGGGAGGA-3'           | 3. 72°C, 45 s        |
| <i>CCL5</i> F                     | 5'-CCTCATTGCTACTGCCCTCT-3'           |                      |
| <i>CCL5</i> R                     | 5'-GGTGTGGTGTCCGAGGAATA-3'           |                      |
| <i>TLR4</i> F                     | 5'-ACCATCATTGGTGTGTCGGTC-3'          |                      |
| <i>TLR4</i> R                     | 5'-AGCCAGCAAGAAGCATCAGG-3'           |                      |
| <i>ICAM1</i> F                    | 5'-GGCCGGCCAGCTTATACAC-3'            |                      |
| <i>ICAM1</i> R                    | 5'-TAGACACTTGAGCTCGGGCA-3'           |                      |
| <i>MMP2</i> F                     | 5'-GCGGCGGTCACAGCTACTT-3'            |                      |

|                                  |                                 |                |
|----------------------------------|---------------------------------|----------------|
| <i>MMP2</i> R                    | 5'-CACGCTCTTCAGACTTTGGTTCT-3'   |                |
| <i>MMP9</i> F                    | 5'-AGGCGCTCATGTACCCTATGTAC-3'   |                |
| <i>MMP9</i> R                    | 5'-GCCGTGGCTCAGGTTCA-3'         |                |
| <i>IL-1<math>\beta</math></i> F  | 5'-GATGTCTGGTCCATATGAACTG-3'    |                |
| <i>IL-1<math>\beta</math></i> R  | 5'-TTGGGATCTACTCTCCAGC-3'       |                |
| <i>IL-6</i> F                    | 5'-AAATTCGGTACATCCTCGACGGCA-3'  |                |
| <i>IL-6</i> R                    | 5'-AGTGCCTCTTTGCTGCTTTCACAC-3'  | 1. 95°C, 30 s  |
| <i>IL-8</i> F                    | 5'-ATGACTTCCAAGCTGGCCGTGGCT-3'  | 2. 56°C, 30 s  |
| <i>IL-8</i> R                    | 5'-TCTCAGCCCTCTTCAAAAATTCT-3'   | 3. 72°C, 45 s  |
| <i>TNF-<math>\alpha</math></i> F | 5'-GTCAGATCATCTTCTCGAACCCCGA-3' |                |
| <i>TNF-<math>\alpha</math></i> R | 5'-CAGGGCAATGATCCCAAAGTAGA-3'   |                |
| <i>iNOS</i> F                    | 5'-CCGAGGCAAACAGCACATTC-3'      | 1. 95°C, 30 s  |
| <i>iNOS</i> R                    | 5'-GGTTGGGGGTGTGGTGATGT-3'      | 2. 60°C, 120 s |
|                                  |                                 | 3. 72°C, 45 s  |
| <b>Mouse primers</b>             |                                 |                |
| <i>Ef-2</i> F                    | 5'-GACATCACCAAGGGTGTGCAG-3'     |                |
| <i>Ef-2</i> R                    | 5'-TCAGCACACTGGCATAGAGGC-3'     |                |
| <i>Il-1<math>\beta</math></i> F  | 5'-TGCCACCTTTTGACAGTGATG-3'     |                |
| <i>Il-1<math>\beta</math></i> R  | 5'-TGATGTGCTGCTGCGAGATT-3'      | 1. 95°C, 30 s  |
| <i>Il-1<math>\alpha</math></i> F | 5'-CGCTTGAGTCGGCAAAGAAA-3'      | 2. 60°C, 30 s  |
| <i>Il-1<math>\alpha</math></i> R | 5'-AACTGTAGTCTTCGTTTTCACTGT-3'  | 3. 72°C, 30 s  |
| <i>Mcpip-1</i> F                 | 5'-CAGCCTCGACCAGATGTGCC-3'      |                |
| <i>Mcpip-1</i> R                 | 5'-CAGCCGCTCCTCGATGAAGC-3'      |                |
